# Supplementary material
Source: ML conference proceedings conference paper supplement (https://proceedings.mlr.press/v54/lakkaraju17a.html)
Supplement: Supplementary file [file lakkaraju17a-supp.pdf]

# Learning Cost-Effective and Interpretable Treatment Regimes (Supplementary)

## 1 Proof for Theorem 1

**Theorem 1:** *The objective function defined in Eqn. 7 is NP-hard.*

**Proof:** Here, we prove that the objective outlined in Eqn. 7 is NP-hard via a reduction to the weighted exact-cover problem.

Recall that our goal is to find a sequence of if-then-else rules (decision list) which maximizes the following objective:

$$\arg \max_{\pi \in C(\mathcal{L}) \times \mathcal{A}} \lambda_1 g_1(\pi) - \lambda_2 g_2(\pi) - \lambda_3 g_3(\pi)$$

where  $g_1(\pi)$ ,  $g_2(\pi)$ , and  $g_3(\pi)$  are as defined in Eqns. 4-6 and correspond to expected outcome, expected assessment cost, and expected treatment cost respectively.  $C(\mathcal{L})$  is the set of permutations of all possible subsets (except the null set) of  $\mathcal{L} = \mathcal{FP} \times \mathcal{A}$  where  $\mathcal{FP}$  denotes the set of frequently occurring patterns each of which is a conjunction of one or more predicates of the form  $(f, o, v)$  (See section 3.2) and  $\mathcal{A}$  is the set of all possible treatments.

The key idea behind this proof lies in demonstrating that the problem of finding an optimal decision list over  $C(\mathcal{L}) \times \mathcal{A}$  can be reformulated as the problem of finding a set of independent if-then rules which are 1) non-overlapping 2) cover all the subjects in the dataset  $\mathcal{D}$ , and 3) optimize our objective function. (1) and (2) together imply that the characteristics of each subject in  $\mathcal{D}$  should satisfy exactly one of these if-then rules.

To illustrate, let us consider a medical treatment recommendation dataset  $\mathcal{D}$  with three characteristics namely, age, gender, and BMI. Let us assume that each subject in this data is assigned to either treatment T1 or T2 and the set  $\mathcal{FP}$  comprises of the following two frequently occurring patterns:

- (1) Age  $\geq 40 \wedge$  Gender = Female;
- (2) BMI = High;

The set  $\mathcal{L} = \mathcal{FP} \times \mathcal{A}$  for this dataset will consist of the following rules:

- (1) (Age  $\geq 40 \wedge$  Gender = Female, T1)
- (2) (Age  $\geq 40 \wedge$  Gender = Female, T2)
- (3) (BMI = High, T1)
- (4) (BMI = High, T2)

Let us assume that the optimal decision list for this dataset is:

```
If Age  $\geq$  40 and Gender=Female then T1
Else T2
```

This list can be rewritten using a set of non-overlapping if-then rules and the negation operator as follows:

```
If Age  $\geq$  40 and Gender=Female then T1
If  $\neg$ (Age  $\geq$  40 and Gender=Female) then T2
```

This simple example shows that a decision list can be easily converted into a set of independent, non-overlapping if-then rules which cover all the subjects in  $\mathcal{D}$ . In order to reformulate our problem of learning an optimal decision list to that of learning a set of if-then rules, we first need to define the candidate set of if-then rules appropriately.

Let us create a new candidate rule set  $\mathcal{L}'$  from  $\mathcal{L}$  as follows: For each rule  $r = (c, a)$  in  $\mathcal{L}$

- add the rule  $r$  to  $\mathcal{L}'$
- create a new rule  $r^c = (\neg c, a)$  and add it to  $\mathcal{L}'$
- append all possible conjunctive combinations of the negations of conditions  $c' \in \mathcal{FP}$  ( $c' \neq c$  and  $c' \neq \neg c$ ) to the condition  $c$  in  $r$  and add these new rules to  $\mathcal{L}'$ .
- append all possible conjunctive combinations of negations of conditions  $c' \in \mathcal{FP}$  ( $c' \neq c$  and  $c' \neq \neg c$ ) to the condition  $\neg c$  in  $r^c$  and add these new rules to  $\mathcal{L}'$ .

Following our example above, the new set  $\mathcal{L}'$  will comprise of the following rules:

- (1) (Age  $\geq 40 \wedge$  Gender = Female, T1)
- (2) (Age  $\geq 40 \wedge$  Gender = Female, T2)
- (3) ( $\neg$ (Age  $\geq 40 \wedge$  Gender = Female), T1)
- (4) ( $\neg$ (Age  $\geq 40 \wedge$  Gender = Female), T2)
- (5) ( $\neg$  (BMI = High)  $\wedge$  Age  $\geq 40 \wedge$  Gender = Female, T1)
- (6) ( $\neg$  (BMI = High)  $\wedge$  Age  $\geq 40 \wedge$  Gender = Female, T2)
- (7) (BMI = High, T1)
- (8) (BMI = High, T2)
- (9) ( $\neg$ (BMI = High), T1)

- (10)  $(\neg(\text{BMI} = \text{High}), \text{T2})$   
 (11)  $(\neg(\text{Age} \geq 40 \wedge \text{Gender} = \text{Female}) \wedge \text{BMI} = \text{High}, \text{T1})$   
 (12)  $(\neg(\text{Age} \geq 40 \wedge \text{Gender} = \text{Female}) \wedge \text{BMI} = \text{High}, \text{T2})$   
 (13)  $(\neg(\text{Age} \geq 40 \wedge \text{Gender} = \text{Female}) \wedge \neg(\text{BMI} = \text{High}), \text{T1})$   
 (14)  $(\neg(\text{Age} \geq 40 \wedge \text{Gender} = \text{Female}) \wedge \neg(\text{BMI} = \text{High}), \text{T2})$

Our problem of learning an optimal decision list can now be solved by choosing a set of if-then rules from the set  $\mathcal{L}'$  such that 1) characteristics of each subject in the data satisfy exactly one rule in the solution set 2) the objective function in Eqn. 7 is maximized. This can be formalized as a weighted exact cover problem:

$$\begin{aligned} & \min \sum_{r_j \in \mathcal{L}'} \Psi(r_j) \phi(r_j) \\ \text{s.t.} \quad & \sum_{\{r_j = (c_j, a_j) \in \mathcal{L}' \mid \text{satisfy}(\mathbf{x}_i, c_j)\}} \phi(r_j) = 1 \quad \forall (\mathbf{x}_i, a_i, y_i) \in \mathcal{D} \\ & \phi(r_j) \in \{0, 1\} \quad \forall r_j \in \mathcal{L}' \end{aligned}$$

$\phi(r_j)$  is an indicator function which is 1 if the rule  $r_j \in \mathcal{L}'$  is chosen to be in the solution set.  $\Psi(r_j)$  represents the weight associated with choosing the rule  $r_j = (c_j, a_j)$  which is defined as:

$$\Psi(r_j) = \sum_{\{i \in \{1 \dots N\} \mid \text{satisfy}(\mathbf{x}_i, c_j)\}} -\frac{\lambda_1}{N} o(i, a_j) + \frac{\lambda_2}{N} \sum_{e \in \mathcal{Q}_j} d(e) + \frac{\lambda_3}{N} d'(a_j)$$

where  $\mathcal{Q}_j$  denotes the set of all characteristics present in the condition  $c_j$ .

Note that the function  $\Psi$  distributes the value of our objective function (Eqn. 7) across the rules in the solution set. Furthermore, weighted exact cover formulation is a minimization problem, so we flip the signs of the terms in our objective (which is a maximization function) when defining the function  $\Psi$ . Since the weighted exact cover problem is NP-Hard, our objective function is also NP-Hard.
